# Supplementary material for: Nickel-doped lithium-vacant layered LiyCr1−xNixO2: a potentially active electrocatalyst for the oxygen evolution reaction
Source: Royal Society of Chemistry journal article supplement (doi:10.1039/d4ta02717e), 2024-01-01
Supplement: d4ta02717e1.pdf [file d4ta02717e1.pdf]

Electronic Supplementary Information

**Nickel doped Lithium-vacant Layered  $\text{Li}_y\text{Cr}_{1-x}\text{Ni}_x\text{O}_2$ : A Potentially Active  
Electrocatalyst for Oxygen Evolution Reaction**

*Vaishali Soni, <sup>a</sup> Shraddha Jaiswal,<sup>a</sup> Krishna Gopal Nigam,<sup>b</sup> Preetam Singh,<sup>b</sup> & Asha  
Gupta<sup>a\*</sup>*

*<sup>a</sup> Department of Chemistry, Indian Institute of Technology (BHU), Varanasi-221005, India.*

*<sup>b</sup> Department of Ceramic Engineering, Indian Institute of Technology (BHU), Varanasi-  
221005, India.*

AUTHOR INFORMATION

**\*Corresponding Author:**

Email- [asha.chy@itbhu.ac.in](mailto:asha.chy@itbhu.ac.in), [toashagupta@gmail.com](mailto:toashagupta@gmail.com), Phone: +91 6390363140.

### Electrochemical active surface area (ECSAs):

The ECSAs were determined by measuring the electrochemical double-layer capacitance ( $C_{dl}$ ) in non-faradic potential regions of 0.9–0.1 V vs. Ag/AgCl at scan rates of 50, 70, 100, 120, 140, 160 mV s<sup>-1</sup>. The  $C_{dl}$  values were calculated by plotting the current density differences ( $i_c = \Delta J/2$ ) against scan rates ( $v$ ), where the slope represents  $C_{dl}$ , and given by the following equation:

$$i_c = C_{dl}v \dots \dots \dots (Eq.1)$$

The ECSA of the catalysts was calculated by using the following formula:

$$ECSA = \frac{C_{dl}}{C_s} \dots \dots \dots (Eq.2)$$

Where  $C_s$  is the specific capacitance of the material per unit area under identical electrolyte conditions.  $C_s = 0.040$  mF cm<sup>-2</sup> in 1.0 M KOH based on reported values [1].

### Turnover frequency (TOF) calculation:

Turnover frequency of the synthesized catalysts was calculated at 350 mV overpotential based on the method reported in previous works [2]. This calculation assumes 100% Faradaic efficiency:

$$TOF = \frac{N_{O_2}}{N_M} \dots \dots \dots (Eq.3)$$

where  $N_{O_2}$  is the number of O<sub>2</sub> turnovers, calculated using the following formula:

$$N_{O_2} = j (mA cm^{-2}) \times (A cm_{oxide}^2) \times \left( \frac{1 Cs^{-1}}{1000 mA} \right) \times \left( \frac{1 mol e^{-}}{96485 C} \right) \times \left( \frac{1 mol O_2}{4 mol e^{-}} \right) \times N_A \dots (Eq.4)$$

where,  $j$  is the measured current density at 350 mV overpotential,  $A$  is the surface area of carbon electrode (1 cm<sup>2</sup>), and  $N_A$  is Avogadro constant ( $6.02 \times 10^{23}$  mol<sup>-1</sup>).

$N_M$  is the number of active metal ions (Cr and Ni) for OER, which is calculated based on the mass loading of the samples (1 mg/cm<sup>2</sup>) using the following formula:

➤ **For LCNO-0(c):** (ICP composition =  $\text{Li}_{0.769}\text{Cr}_{1.003}\text{O}_2$ )

$$N_M = (1.003\text{Cr}) \times (1 \times 10^{-3}\text{g}) \times \frac{N_A}{\text{molecular weight}}$$

$$N_M = 0.0675 \times 10^{20}$$

$j = 11.74 \text{ mA cm}^{-2}$  at 350 mV overpotential.

$$N_{O_2} = 11.74 (\text{mA cm}^{-2}) \times (1 \text{ cm}_{\text{oxide}}^2) \times \left(\frac{1 \text{ Cs}^{-1}}{1000 \text{ mA}}\right) \times \left(\frac{1 \text{ mol } e^-}{96485 \text{ C}}\right) \times \left(\frac{1 \text{ mol } O_2}{4 \text{ mol } e^-}\right) \times N_A$$

$$N_{O_2} = 0.1831 \times 10^{17}$$

$$TOF = \frac{0.1831 \times 10^{17}}{0.0676 \times 10^{20}} = 2.712 \times 10^{-3} \text{ s}^{-1}$$

➤ **For LCNO-10(c):** (ICP composition =  $\text{Li}_{0.698}\text{Cr}_{0.903}\text{Ni}_{0.098}\text{O}_2$ )

$$N_M = (0.903\text{Cr} + 0.098\text{Ni}) \times (1 \times 10^{-3}\text{g}) \times \frac{N_A}{\text{molecular weight}}$$

$$N_M = 0.0674 \times 10^{20}$$

$j = 40.6 \text{ mA cm}^{-2}$  at 350 mV overpotential.

$$N_{O_2} = 40.6 (\text{mA cm}^{-2}) \times (1 \text{ cm}_{\text{oxide}}^2) \times \left(\frac{1 \text{ Cs}^{-1}}{1000 \text{ mA}}\right) \times \left(\frac{1 \text{ mol } e^-}{96485 \text{ C}}\right) \times \left(\frac{1 \text{ mol } O_2}{4 \text{ mol } e^-}\right) \times N_A$$

$$N_{O_2} = 0.6334 \times 10^{17}$$

$$TOF = \frac{0.6334 \times 10^{17}}{0.0674 \times 10^{20}} = 9.397 \times 10^{-3} \text{ s}^{-1}$$

### Determination of Faradaic Efficiency:

The faradaic efficiency of catalyst was determined by conducting the rotating ring-disk electrode (RRDE) experiment on an electrochemical work station based on Pine research

equipment (Wave Driver 200, USA). The experiment was performed using a rotating ring-disk electrode (RRDE) as working electrode that consists of a Pt ring and glassy carbon disk (0.196 cm<sup>2</sup>), a Hg/HgO reference electrode and Pt wire counter electrode in 1 M KOH electrolyte. About 10 mg of LCNO-10(c) and 3 mg activated carbon were added in 1ml of water/isopropanol (3:1) solution containing 15 µl of Nafion binder, and dispersed by sonicating for 30 min to generate homogenous catalyst ink. About 10 µl of catalyst ink was coated onto the GC disk (RRDE) with a catalyst loading amount of ~0.5 mg cm<sup>-2</sup>. An LSV curve was recorded at a scan rate of 5 mV s<sup>-1</sup> with a rotation rate of 1400 rpm by sweeping the potential at the disk from 1.0 to 1.8 V vs. RHE, and the O<sub>2</sub> molecules that evolved were reduced at the Pt ring, where a potential of -0.5 V was kept constant to enable an efficient oxygen reduction reaction (ORR). The calculation of the faradaic efficiency was performed using the following equation [3]:

$$\text{Faradaic Efficiency} = \frac{j_R \times n_D}{j_R \times n_R \times N_{CL}} \dots\dots\dots (\text{Eq.5})$$

where, j<sub>R</sub> and j<sub>D</sub> are the ring and disk current densities at a particular potential, n<sub>D</sub> and n<sub>R</sub> are the number of electrons transferred during the evolution and reduction of O<sub>2</sub> at disk and ring, respectively, which is 4. N<sub>CL</sub> is the collection efficiency of the RRD electrode. The average collection efficiency of the RRDE used here is 0.439.

**For LCNO-10(c):** at 1.6 V vs. RHE

$$\begin{aligned} \text{FE} &= 13.2 \times 4 / 32.9 \times 4 \times 0.439 \\ &= 0.9139 \times 100 \\ &= 91.39 \% \end{aligned}$$

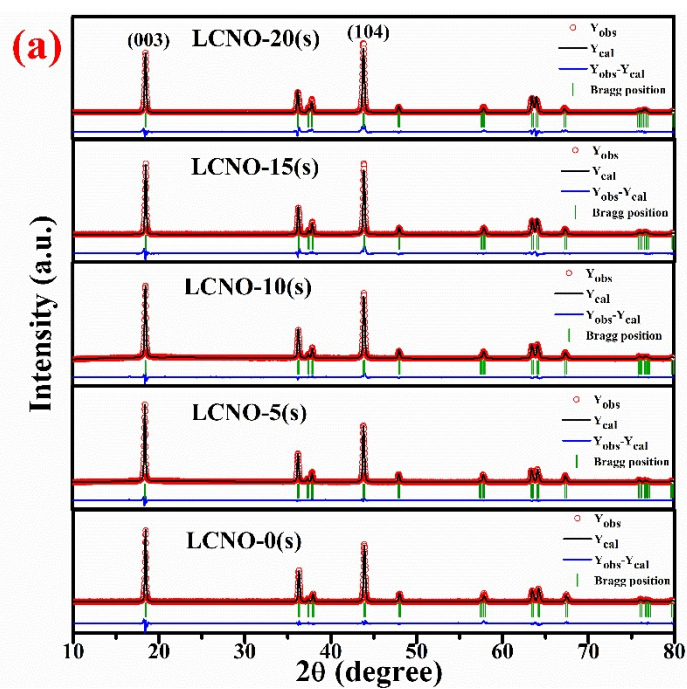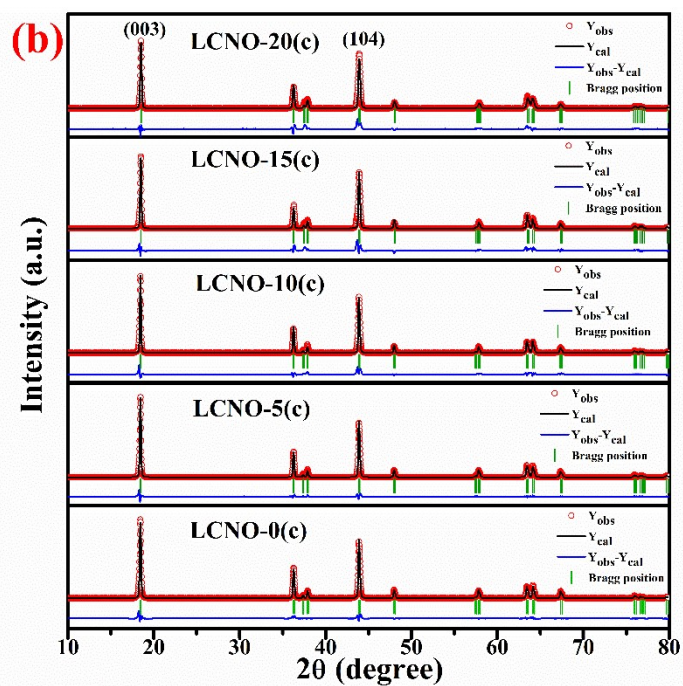

**Fig. S1** Rietveld refined powder XRD patterns of  $\text{Li}_y\text{Cr}_{1-x}\text{Ni}_x\text{O}_2$  ( $y \leq 1$ ,  $0 \leq x \leq 0.2$ ). **(a)** solid-state and **(b)** solution combustion synthesized samples.

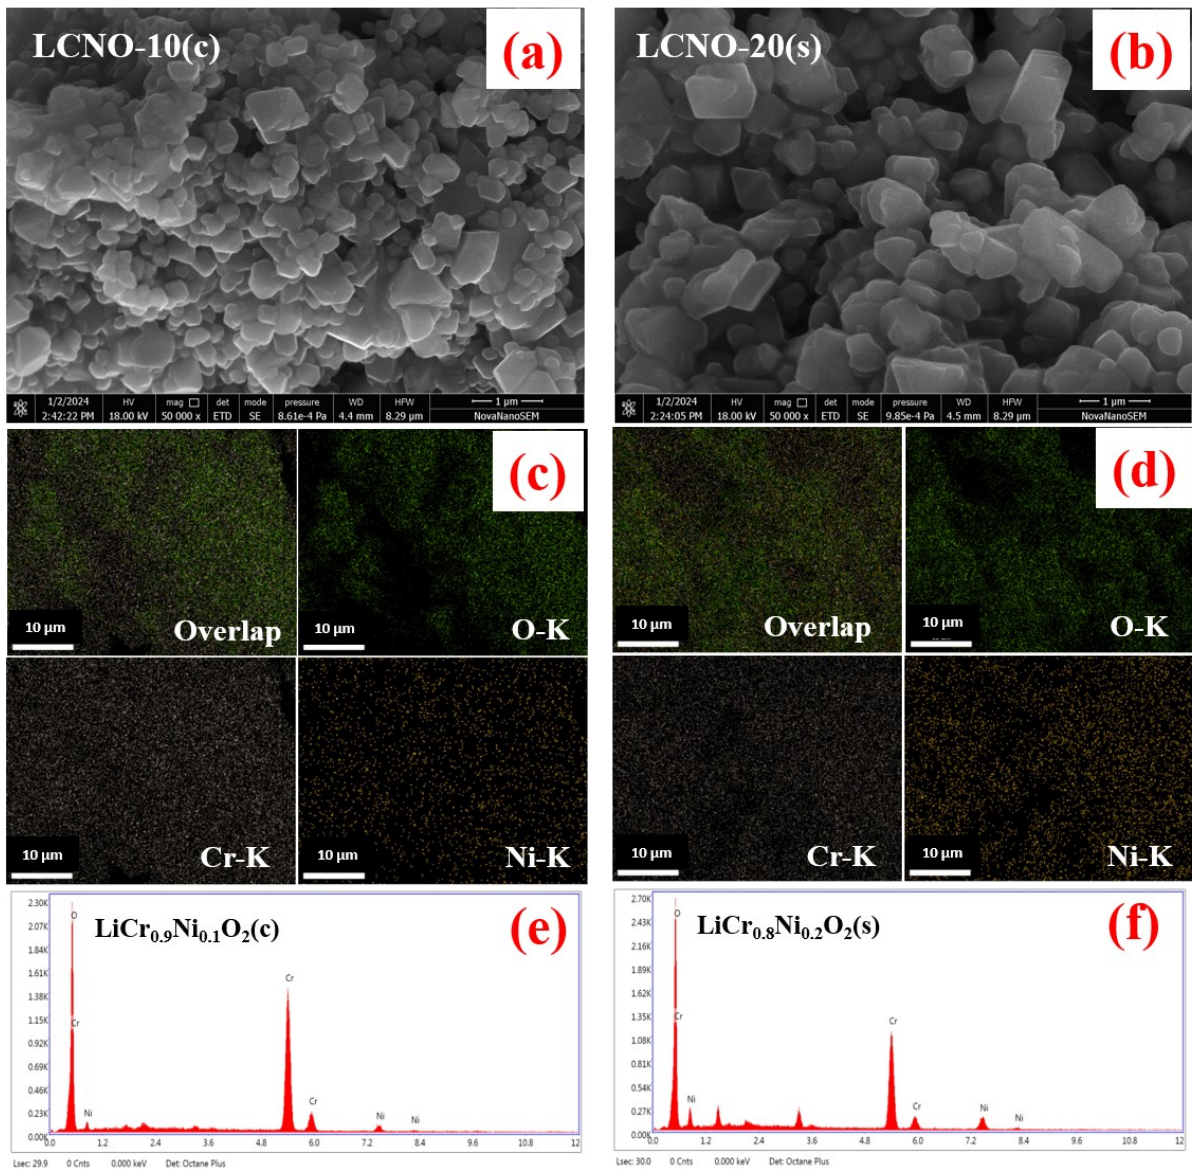

**Fig. S2** SEM micrograph of (a) LCNO-10(c), (b) LCNO-20(s), (c), (d) elemental mapping of individual elements (O, Cr, and Ni) present in the LCNO-10(c) and LCNO-20(s) samples, respectively, and (e), (f) EDS spectrum of LCNO-10(c) and LCNO-20(s). Note: Li signals are absent in EDS analysis as EDS techniques are not capable of recording signals for the Li core level.

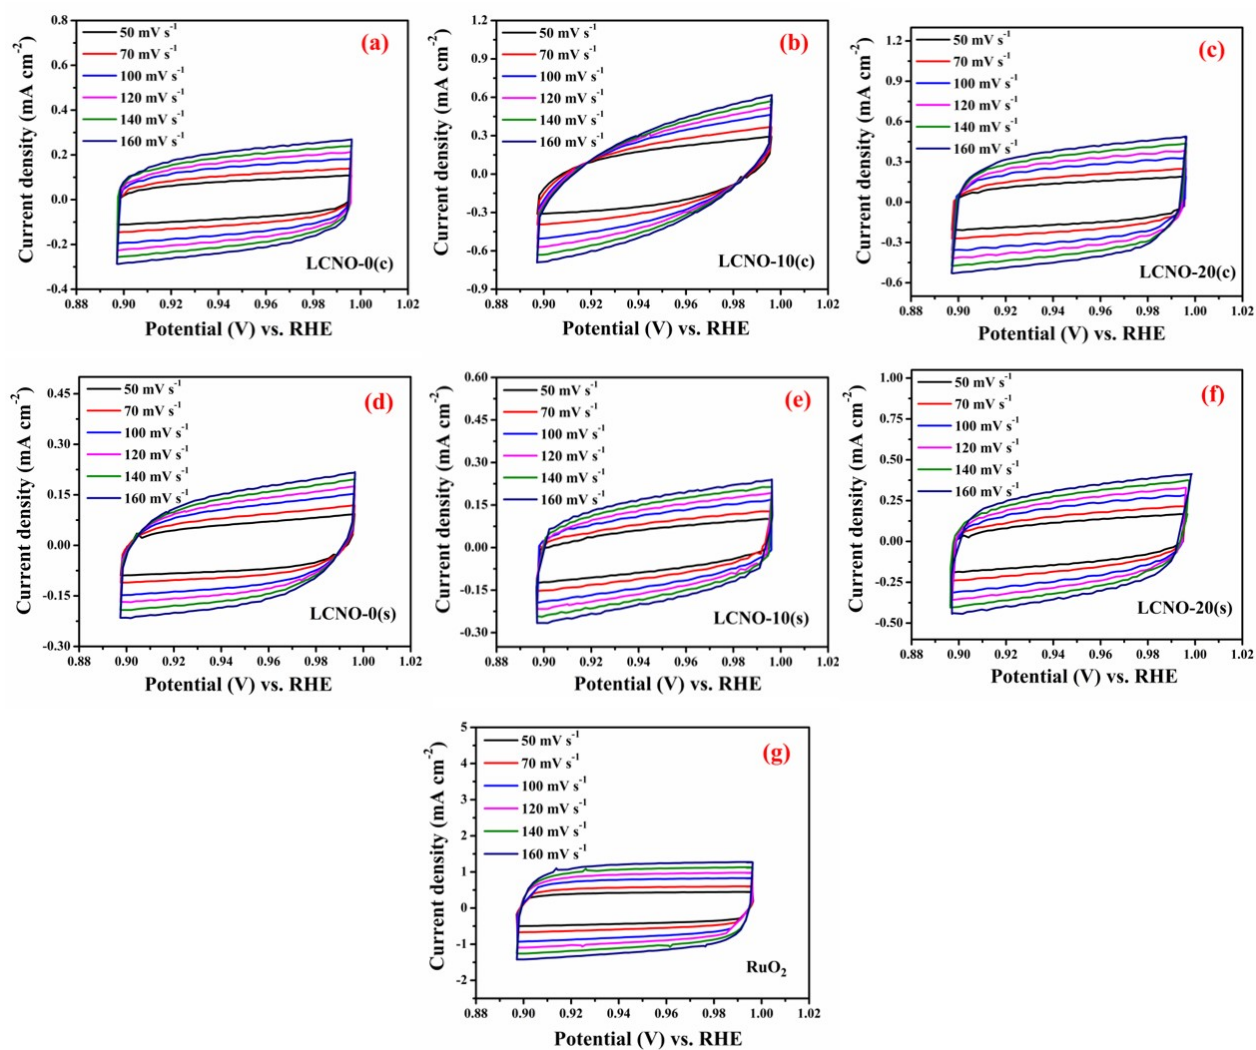

**Fig. S3** Determination of double layer capacitance ( $C_{dl}$ ) of different LCNOs (synthesized by solid-state and combustion method) and commercial  $\text{RuO}_2$ . **(a-g)** CV measurements in a non-faradic current region (0.9-1.0 V vs. RHE) at scan rates of 50, 100, 120, 140 and 160  $\text{mV s}^{-1}$  in 1 M KOH electrolyte.

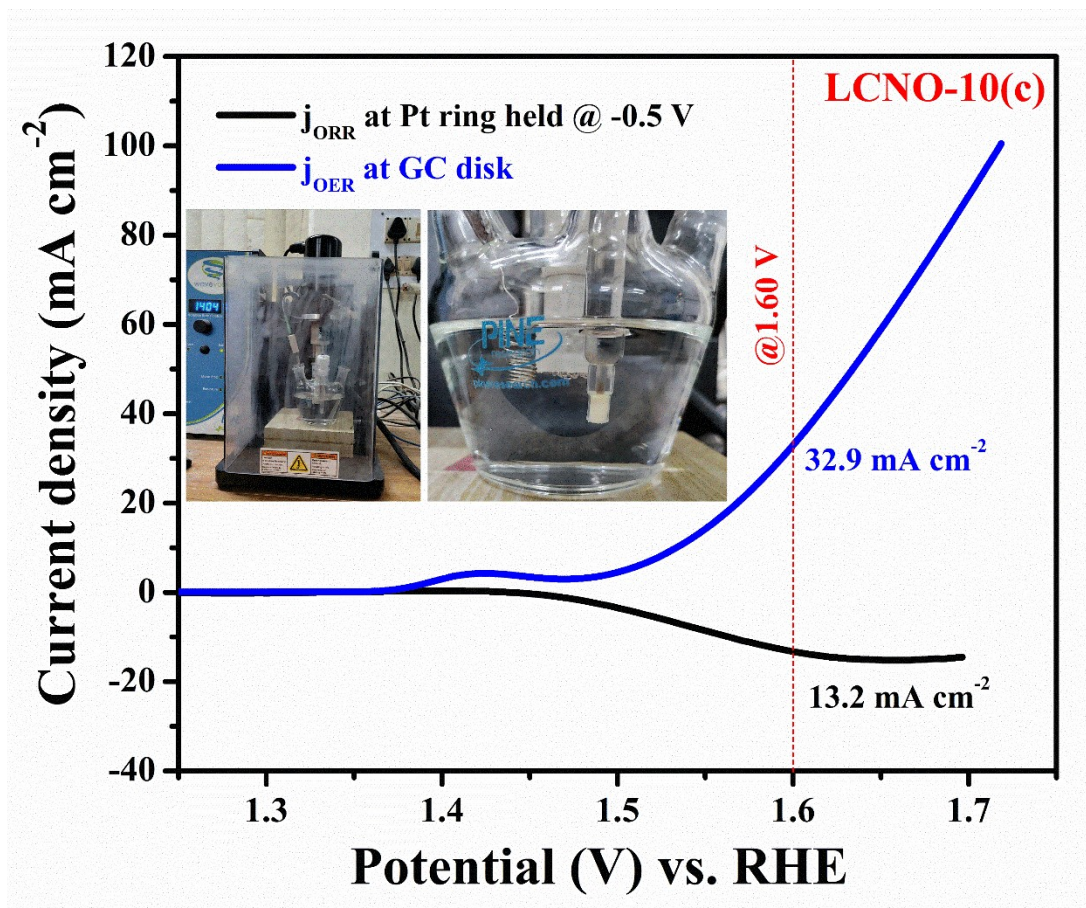

**Fig. S4** The RRDE polarization at GC disk and the corresponding ORR response at Pt ring obtained with LCNO-10(c) for faradaic efficiency calculation.



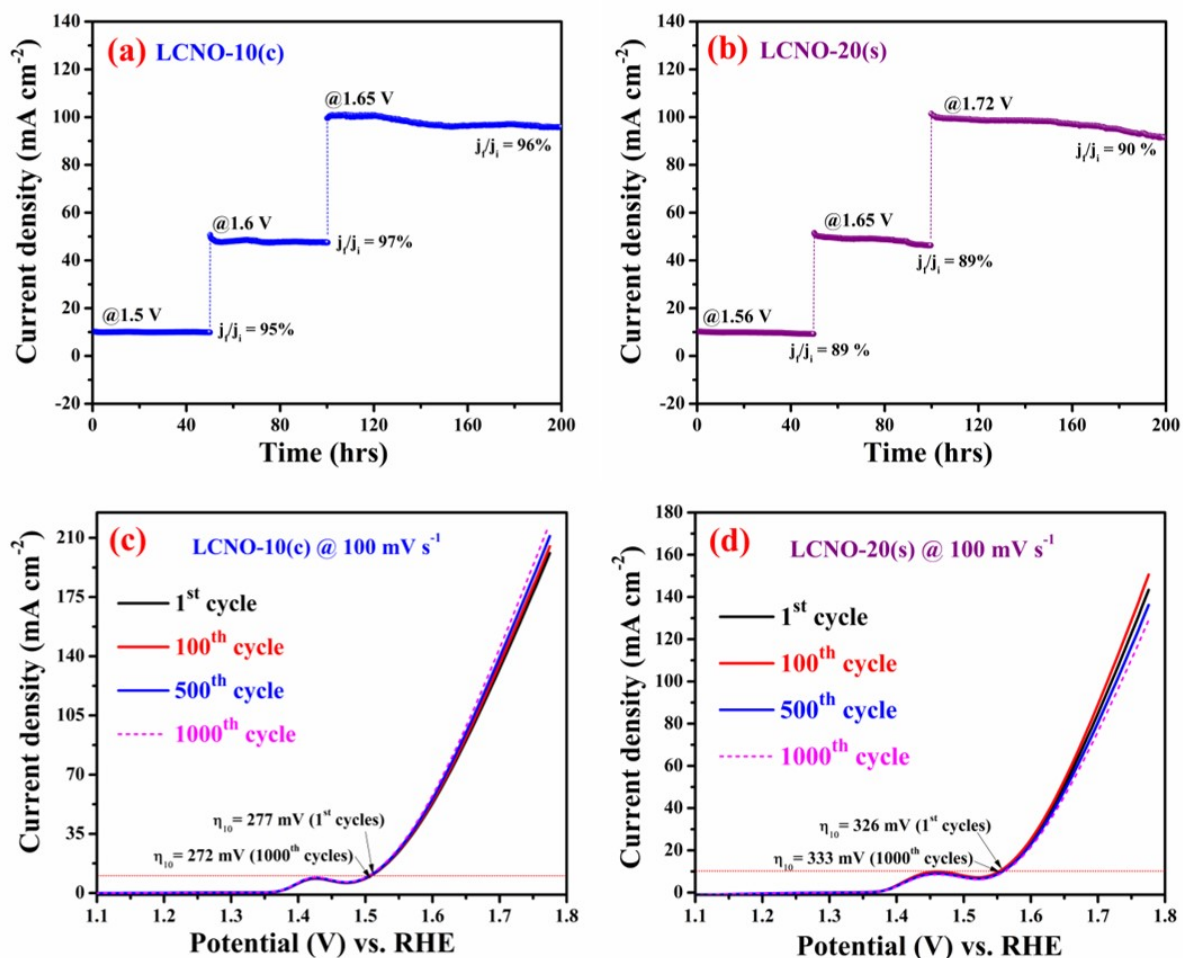

**Fig. S5** Stability test (a) chronoamperogram of LCNO-10(c) at measured potential of 1.5, 1.6 and 1.65 V vs. RHE for 200 hrs, (b) chronoamperogram of LCNO-20(s) at measured potential of 1.56, 1.65 and 1.72 V vs. RHE for 200 hrs, and (c), (d) shows the linear sweep voltammograms for the 1<sup>st</sup>, 100<sup>th</sup>, 500<sup>th</sup> and 1000<sup>th</sup> cycle at a scan rate of 100 mV s<sup>-1</sup>. (Note: the long-term chronoamperometry test was performed using Hg/HgO reference electrode).

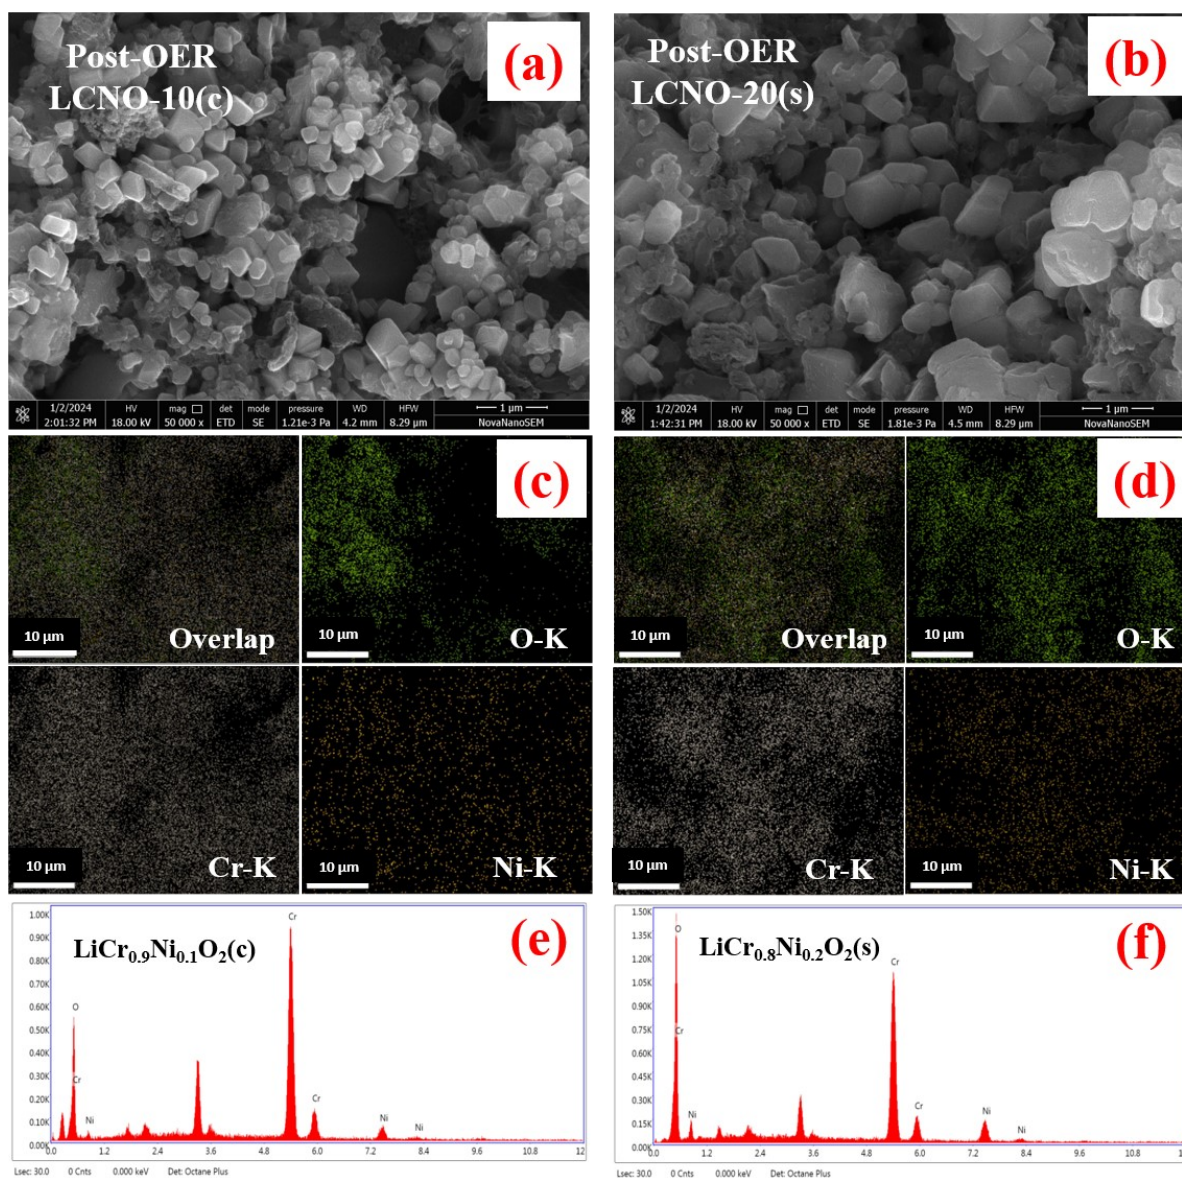

**Fig. S6** Post-OER SEM micrographs of (a) LCNO-10(c), (b) LCNO-20(s), (c), (d) corresponding elemental mapping and (e), (f) EDS spectrum confirming the presence of O, Cr, and Ni in the LCNO-10(c) and LCNO-20(s) electrodes, respectively. Note: Li signals are absent in EDS analysis as EDS techniques are not capable of recording signals for the Li core level.

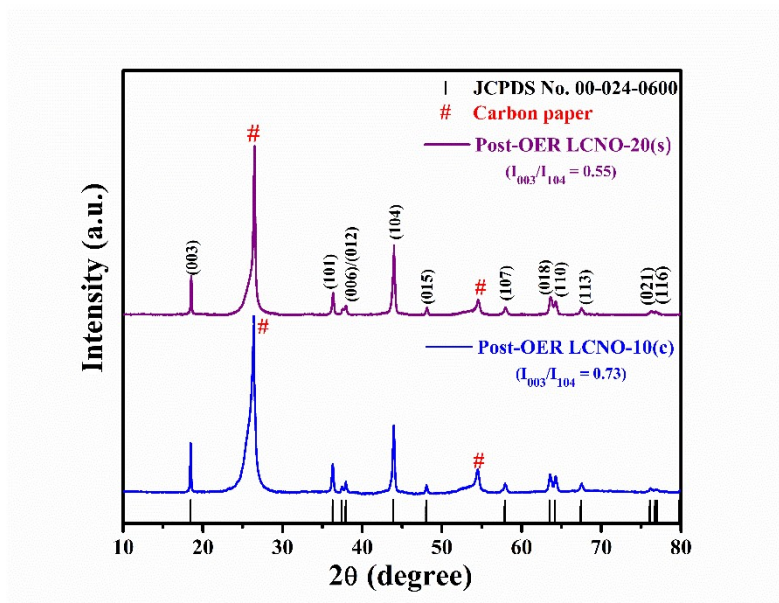

**Figure S7** Post-OER XRD pattern of LCNO-10(c) and LCNO-20(s) electrodes.

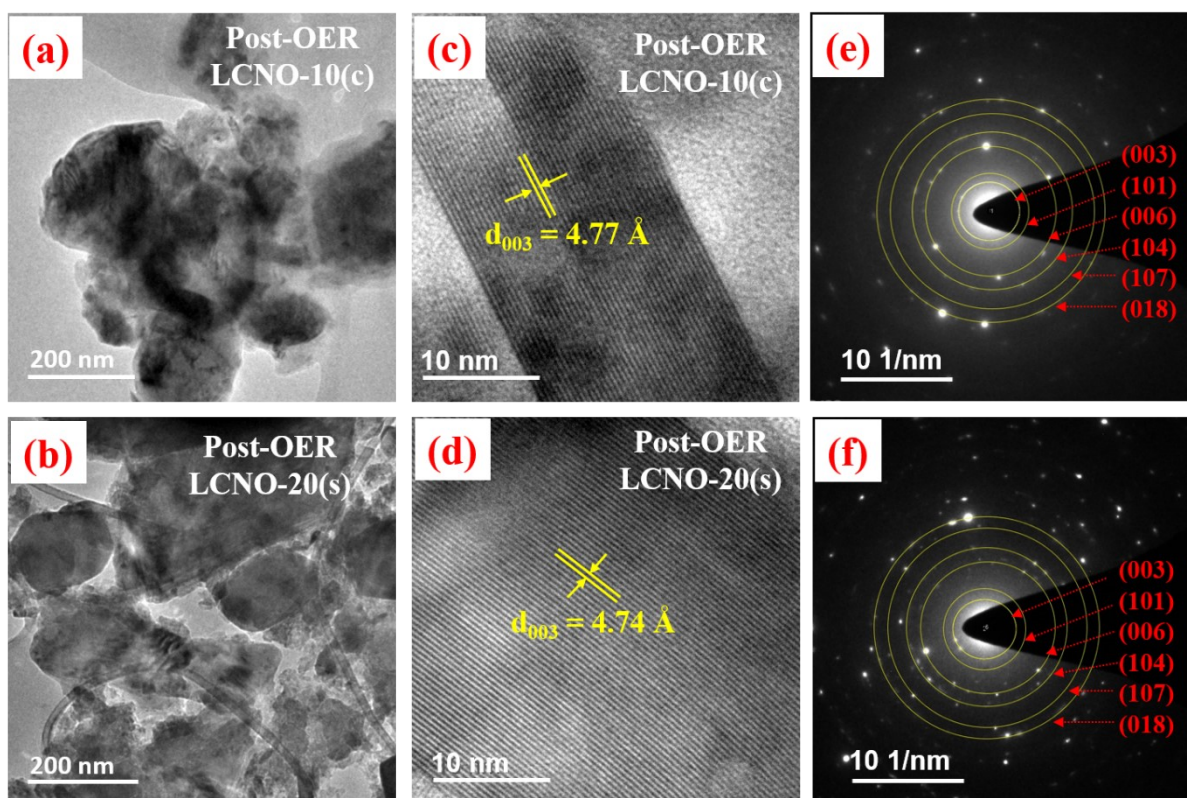

**Fig. S8** Post-OER TEM micrographs. (a), (b) Bright-field TEM image, (c), (d) HR-TEM with interplanar d-spacing of (003) plane, (e), (f) SAED pattern of LCNO-10(c) and LCNO-20(s) samples, respectively.

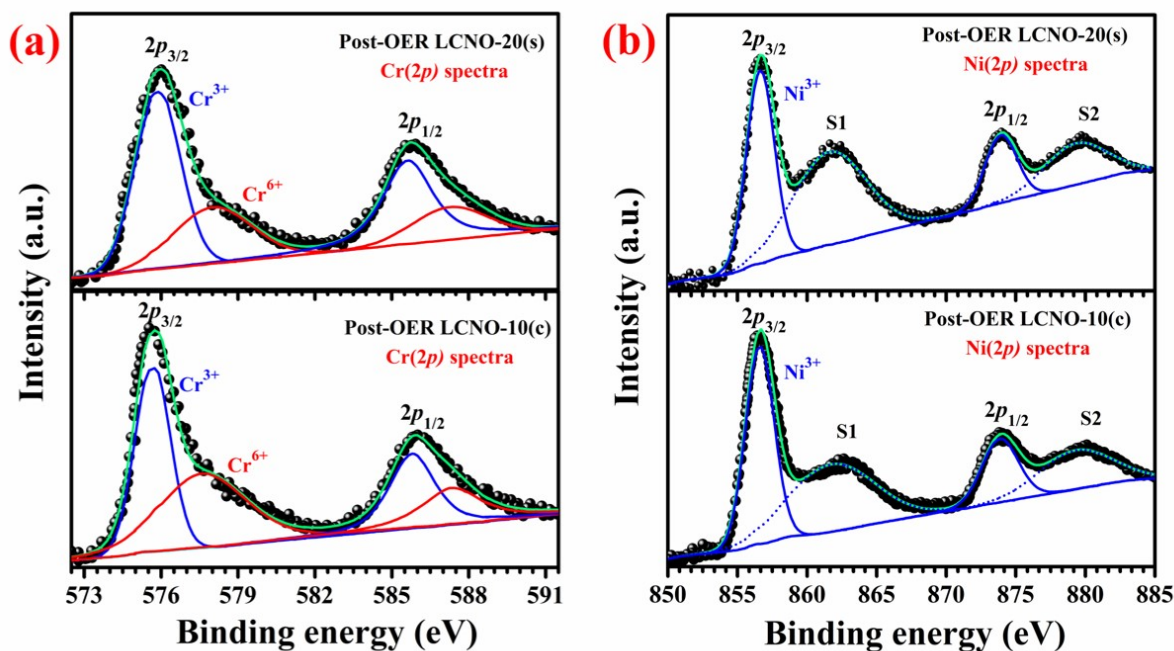

Fig. S9 Post-OER (a) Cr(2p) and (b) Ni(2p) spectra of LCNO-10(c) and LCNO-20(s) electrodes.

Table S1. XPS deconvoluted peak positions and % composition in Cr(2p) spectra for  $\text{Li}_y\text{Cr}_{1-x}\text{Ni}_x\text{O}_2$  ( $y \leq 1, 0 \leq x \leq 0.2$ ) synthesized by combustion and solid-state method.

| Samples            |            |                  | Binding energy (eV) |            | Relative concentration (%) |
|--------------------|------------|------------------|---------------------|------------|----------------------------|
|                    |            |                  | $2p_{3/2}$          | $2p_{1/2}$ |                            |
| Solid state method | LCNO-0(s)  | Cr <sup>3+</sup> | 575.3               | 585.4      | 89                         |
|                    |            | Cr <sup>6+</sup> | 577.5               | 587.4      | 11                         |
|                    | LCNO-10(s) | Cr <sup>3+</sup> | 575.7               | 585.6      | 81                         |
|                    |            | Cr <sup>6+</sup> | 577.6               | 587.6      | 19                         |
|                    | LCNO-20(s) | Cr <sup>3+</sup> | 575.8               | 585.8      | 74                         |
|                    |            | Cr <sup>6+</sup> | 577.7               | 587.7      | 26                         |
| Combustion method  | LCNO-0(c)  | Cr <sup>3+</sup> | 575.6               | 585.3      | 86                         |
|                    |            | Cr <sup>6+</sup> | 577.5               | 587.2      | 14                         |
|                    | LCNO-10(c) | Cr <sup>3+</sup> | 575.9               | 585.7      | 67                         |
|                    |            | Cr <sup>6+</sup> | 577.4               | 587.3      | 33                         |
|                    | LCNO-20(c) | Cr <sup>3+</sup> | 575.7               | 585.5      | 71                         |
|                    |            | Cr <sup>6+</sup> | 577.4               | 587.4      | 29                         |

**Table S2.** XPS deconvoluted peak positions and % composition in Ni(2p) spectra for  $\text{Li}_y\text{Cr}_{1-x}\text{Ni}_x\text{O}_2$  ( $y \leq 1, 0 \leq x \leq 0.2$ ) synthesized by combustion and solid-state method.

| Samples            |            |                  | Binding energy (eV) |            |       |       | Relative concentration (%) |
|--------------------|------------|------------------|---------------------|------------|-------|-------|----------------------------|
|                    |            |                  | $2p_{3/2}$          | $2p_{1/2}$ | S1    | S2    |                            |
| Solid state method | LCNO-10(s) | Ni <sup>3+</sup> | 855.3               | 873.1      | 861.4 | 878.9 | 76                         |
|                    |            | Ni <sup>2+</sup> | 853.6               | 871.4      | 859.3 | 877.0 | 24                         |
|                    | LCNO-20(s) | Ni <sup>3+</sup> | 855.4               | 873.3      | 861.1 | 879.0 | 81                         |
|                    |            | Ni <sup>2+</sup> | 853.8               | 871.3      | 859.4 | 877.1 | 19                         |
| Combustion method  | LCNO-10(c) | Ni <sup>3+</sup> | 855.5               | 873.3      | 861.2 | 879.2 | 90                         |
|                    |            | Ni <sup>2+</sup> | 853.9               | 871.6      | 859.2 | 877.1 | 10                         |
|                    | LCNO-20(c) | Ni <sup>3+</sup> | 855.4               | 873.4      | 861.1 | 879.1 | 85                         |
|                    |            | Ni <sup>2+</sup> | 853.7               | 871.5      | 859.3 | 877.2 | 15                         |

**Table S3.** The fitted  $R_{ct}$  values from the Nyquist plot for  $\text{Li}_y\text{Cr}_{1-x}\text{Ni}_x\text{O}_2$  ( $y \leq 1, 0 \leq x \leq 0.2$ ) catalysts synthesized by combustion and solid-state method.

| Solid-state synthesized samples (s) | $R_{ct}$ ( $\Omega$ ) | Combustion synthesized samples (c) | $R_{ct}$ ( $\Omega$ ) |
|-------------------------------------|-----------------------|------------------------------------|-----------------------|
| LCNO-0(s)                           | 37.03                 | LCNO-0(c)                          | 19.25                 |
| LCNO-5(s)                           | 23.66                 | LCNO-5(c)                          | 14.65                 |
| LCNO-10(s)                          | 20.43                 | LCNO-10(c)                         | 6.6                   |
| LCNO-15(s)                          | 16.24                 | LCNO-15(c)                         | 8.85                  |
| LCNO-20(s)                          | 11.36                 | LCNO-20(c)                         | 12.3                  |

**Table S4.** Tafel slope and  $R_{ct}$  values of synthesized catalysts along with commercial  $\text{RuO}_2$  (as a benchmark catalyst).

| Catalysts      | Tafel slope ( $\text{mV dec}^{-1}$ ) | $R_{ct}$ ( $\Omega$ ) |
|----------------|--------------------------------------|-----------------------|
| $\text{RuO}_2$ | 83                                   | 17.33                 |
| LCNO-10(c)     | 63                                   | 6.6                   |
| LCNO-20(c)     | 79                                   | 12.3                  |
| LCNO-10(s)     | 85                                   | 20.43                 |
| LCNO-20(s)     | 95                                   | 11.36                 |

**Table S5.** Calculated  $C_{dl}$  and ECSA values for  $Li_yCr_{1-x}Ni_xO_2$  ( $y \leq 1$ ,  $0 \leq x \leq 0.2$ ) catalysts synthesized by combustion and solid-state method along with commercial  $RuO_2$  (as a benchmark catalyst).

| Catalyst   | $C_{dl}$ (mF cm <sup>-2</sup> ) | ECSA (cm <sup>2</sup> mg <sup>-1</sup> ) |
|------------|---------------------------------|------------------------------------------|
| LCNO-0(c)  | 1.53                            | 38.25                                    |
| LCNO-10(c) | 3.2                             | 80                                       |
| LCNO-20(c) | 2.8                             | 70                                       |
| LCNO-0(s)  | 1.13                            | 28.25                                    |
| LCNO-10(s) | 1.3                             | 32.5                                     |
| LCNO-20(s) | 2.3                             | 57.5                                     |
| $RuO_2$    | 7.9                             | 197.5                                    |

**Table S6:** Turnover frequencies (TOF) of different  $Li_yCr_{1-x}Ni_xO_2$  ( $y \leq 1$ ,  $0 \leq x \leq 0.2$ ) catalysts synthesized by combustion and solid-state method.

| Samples            |            | ICP composition                                       | No. of O <sub>2</sub> turnover ( $N_{O_2}$ ) | No. of active metal ions ( $N_M$ )        | TOF (s <sup>-1</sup> )                  |
|--------------------|------------|-------------------------------------------------------|----------------------------------------------|-------------------------------------------|-----------------------------------------|
| Combustion method  | LCNO-0(c)  | $Li_{0.769}Cr_{1.003}O_2$                             | $0.1831 \times 10^{17}$                      | $0.0675 \times 10^{20}$                   | $2.71 \times 10^{-3}$                   |
|                    | LCNO-5(c)  | $Li_{0.799}Cr_{0.949}Ni_{0.049}O_2$                   | $0.2802 \times 10^{17}$                      | $0.0669 \times 10^{20}$                   | $4.19 \times 10^{-3}$                   |
|                    | LCNO-10(c) | <b><math>Li_{0.698}Cr_{0.903}Ni_{0.098}O_2</math></b> | <b><math>0.6334 \times 10^{17}</math></b>    | <b><math>0.0674 \times 10^{20}</math></b> | <b><math>9.39 \times 10^{-3}</math></b> |
|                    | LCNO-15(c) | $Li_{0.778}Cr_{0.851}Ni_{0.148}O_2$                   | $0.4725 \times 10^{17}$                      | $0.0666 \times 10^{20}$                   | $7.09 \times 10^{-3}$                   |
|                    | LCNO-20(c) | $Li_{0.749}Cr_{0.801}Ni_{0.199}O_2$                   | $0.3929 \times 10^{17}$                      | $0.0665 \times 10^{20}$                   | $5.91 \times 10^{-3}$                   |
| Solid-state method | LCNO-0(s)  | $Li_{0.669}Cr_{1.003}O_2$                             | $0.0659 \times 10^{17}$                      | $0.0679 \times 10^{20}$                   | $0.98 \times 10^{-3}$                   |
|                    | LCNO-5(s)  | $Li_{0.749}Cr_{0.949}Ni_{0.051}O_2$                   | $0.1635 \times 10^{17}$                      | $0.0672 \times 10^{20}$                   | $2.43 \times 10^{-3}$                   |
|                    | LCNO-10(s) | $Li_{0.731}Cr_{0.902}Ni_{0.098}O_2$                   | $0.1527 \times 10^{17}$                      | $0.0671 \times 10^{20}$                   | $2.27 \times 10^{-3}$                   |
|                    | LCNO-15(s) | $Li_{0.720}Cr_{0.851}Ni_{0.149}O_2$                   | $0.2193 \times 10^{17}$                      | $0.0668 \times 10^{20}$                   | $3.28 \times 10^{-3}$                   |
|                    | LCNO-20(s) | $Li_{0.698}Cr_{0.801}Ni_{0.198}O_2$                   | $0.2608 \times 10^{17}$                      | $0.0667 \times 10^{20}$                   | $3.91 \times 10^{-3}$                   |

**Table S7.** The post-OER ICP analysis of  $\text{Li}_y\text{Cr}_{1-x}\text{Ni}_x\text{O}_2$  ( $y \leq 1$ ,  $0 \leq x \leq 0.2$ ) synthesized by combustion and solid-state method.

| Samples            |            | Post-OER ICP composition of $\text{Li}_y\text{Cr}_{1-x}\text{Ni}_x\text{O}_2$ ( $y \leq 1$ , $0 \leq x \leq 0.2$ ) |       |       |
|--------------------|------------|--------------------------------------------------------------------------------------------------------------------|-------|-------|
|                    |            | Li                                                                                                                 | Cr    | Ni    |
| Combustion method  | LCNO-0(c)  | 0.767                                                                                                              | 1.001 | 0.000 |
|                    | LCNO-5(c)  | 0.798                                                                                                              | 0.948 | 0.048 |
|                    | LCNO-10(c) | 0.696                                                                                                              | 0.899 | 0.097 |
|                    | LCNO-15(c) | 0.775                                                                                                              | 0.848 | 0.147 |
|                    | LCNO-20(c) | 0.745                                                                                                              | 0.799 | 0.198 |
| Solid-state method | LCNO-0(s)  | 0.668                                                                                                              | 1.003 | 0.000 |
|                    | LCNO-5(s)  | 0.748                                                                                                              | 0.947 | 0.049 |
|                    | LCNO-10(s) | 0.718                                                                                                              | 0.897 | 0.097 |
|                    | LCNO-15(s) | 0.729                                                                                                              | 0.849 | 0.148 |
|                    | LCNO-20(s) | 0.695                                                                                                              | 0.797 | 0.198 |

### References:

1. C. C. L. McCrory, S. Jung, I. M. Ferrer, S. M. Chatman, J. C. Peters and T. F. Jaramillo, Benchmarking hydrogen evolving reaction and oxygen evolving reaction electrocatalysts for solar water splitting devices, *J. Am. Chem. Soc.*, 2015, **137**(13), 4347–4357.
2. Y. Lin, Z. Tian, L. Zhang, J. Ma, Z. Jiang, B. J. Deibert, R. Ge and L. Chen, Chromium-ruthenium oxide solid solution electrocatalyst for highly efficient oxygen evolution reaction in acidic media, *Nature Commun.*, 2019, **10**(1), 162.
3. S. Anantharaj, P. E. Karthik and S. Kundu, Petal-like hierarchical array of ultrathin  $\text{Ni}(\text{OH})_2$  nanosheets decorated with  $\text{Ni}(\text{OH})_2$  nanoburls: a highly efficient OER electrocatalyst, *Catal. Sci. Technol.*, 2017, **7**, 882-893.
